# Supplementary material for: Fine Mapping of CsVYL, Conferring Virescent Leaf Through the Regulation of Chloroplast Development in Cucumber
Source: Front Plant Sci. 2018 Apr 6;9:432. doi: 10.3389/fpls.2018.00432 (PMC5897749; doi:10.3389/fpls.2018.00432)
Supplement: Supplementary file 4 [file Table_4.XLS]

## Sheet: 新建文本文档
Supplementary Table 4 The whole genome sequencing reports of vyl and ‘Hazerd’.
Sample	Sequencing depth	Mapping rate(%)	GC%	SNP number	InDel number
vyl	28.47	75.4	48.4	67065	8275
Hazerd	27.75	83.52	37.3	291058	254811
